# Supplementary material for: Cluster-specific gene markers enhance Shigella and enteroinvasive Escherichia coli in silico serotyping
Source: PubMed Central journal article supplement — Microb Genom. 2021 Dec 10;7(12):000704. doi: 10.1099/mgen.0.000704 (PMC8767346; doi:10.1099/mgen.0.000704), 2021-12-10
Supplement: mgen-7-0704-s001.pdf [file mgen-7-0704-s001.pdf]

### **Dataset S1: Additional scripts information:**

Usage and further details can be found in the scripts folder at [github.com/LanLab/ShigEiFinder](https://github.com/LanLab/ShigEiFinder).

#### ***clade\_specific\_gene\_combinations.py* :**

This script was used to identify specific gene sets for each cluster from the pan genomes of the identification dataset. The script ran on one cluster at a time. The script takes in 4 inputs, a roary presence absence file, a genome cluster assignment file, the genomes of all isolates, the annotated genes in all genomes (as used in roary). The script first identified individual candidate genes that were present in all isolates of the target cluster (true positives) and were present only in a percentage of non-target cluster isolates (false positives). For the list of candidates each combination of genes was tested to see whether all are found in the same false positive strain. If a set of genes are never all found together then that set of genes is reported as a result. The size of the gene combinations starts at 1 for the whole list and increases progressively. At each size, successful sets of genes were reported until the total number of reported sets equals the maximum specified in the settings. Additionally, if a successful set of 2 genes (for example) was found within a subsequent set of 3 genes that three gene set was excluded because the additional gene provides no benefit.

#### ***extract\_gene\_sequences\_from\_roary.py*:**

This script extracts specific gene set sequences for sets produced by *clade\_specific\_gene\_combinations.py*. The script accepted 4 inputs: the presence absence roary output csv, the annotated genes in all genomes (as used in roary), a list of cluster specific genes sets and their corresponding cluster, a list of genome ids and their corresponding cluster. An output prefix is also required. The script will:

- select a representative genome from each cluster
- identify the roary orthologue group that contains a given specific gene
- retrieve the gene ID for that orthologue group and the representative genome
- extract the gene from the genes fasta file for that genome
- save the specific gene to an output file (output prefix)
- produce a summary file of genes retrieved (output prefix)

### **The selection of cluster/lineage-specific gene markers after initial screening**

- Obtain the list of genes for each set (Specific\_genes\_groupID.txt) from the output file after running script: `clade_specific_gene_combinations-fnfp.py`.
- Extract the sequences of genes using script: `prokka_genome_gene_from_roary.py`.
- Run `blastn` against identification dataset with the sequence identity of 80% to check for truncated orthologues which are not evaluated in `roary`.
- Gene length filtering for `blastn` output:  $\geq 50\%$  length coverage.
- Check the number of FN and FP for each cluster/lineage-specific gene set (the output file from running `clade_specific_gene_combinations-fnfp.py`), combined with the `blastn` results, the gene set with the lowest FN and FPs was selected.

## **Dataset S2: Algorithms incorporated into the ShigEiFinder**

ShigEiFinder stands for *Shigella* EIEC Cluster Enhanced Serotype Finder and is a cluster-specific gene marker based *in silico* pipeline developed for differentiation of *Shigella* and enteroinvasive *E. coli* (EIEC) and serotyping of *Shigella* and EIEC. ShigEiFinder is available as a web tool (<https://mgtdb.unsw.edu.au/ShigEiFinder/>) and on github (<https://github.com/LanLab/ShigEiFinder>).

Note that for brevity, in all references to *Shigella* serotypes below, *Shigella sonnei*, *Shigella flexneri*, *Shigella boydii* and *Shigella dysenteriae* are abbreviated as SS, SF, SB and SD respectively and a serotype is designated with abbreviated “species” name plus the serotype number e.g. *Shigella dysenteriae* serotype 1 is abbreviated as SD1.

### **Typing reference sequences used in ShigEiFinder**

The typing reference sequences consisted of cluster-specific gene markers and sporadic EIEC lineages specific gene markers from this study, *ipaH* gene, 38 virulence genes, *Shigella* serotype specific O antigen genes collected from ShigaTyper (1), *E.coli* O antigen genes and *fliC* genes collected from SerotypeFinder (2) and 7 House Keeping (HK) genes from the MLST (3) scheme.

The cluster-specific gene marker sets and sporadic EIEC lineages specific gene markers are listed as supplementary material with file name in Table S3. The 38 virulence genes are listed in “Analysis of the 59 sporadic EIEC isolates” section in the main text. *Shigella* and *E.coli* O and H antigen genes are listed as supplementary material with file name in Data S3.

All sequences are listed in fasta format available at <https://github.com/LanLab/ShigEiFinder>.

### **ShigEiFinder input**

Either paired end Illumina sequencing reads or assembled genomes are acceptable.

### **ShigEiFinder output**

ShigEiFinder output included the sample, presence of *ipaH* gene, number of virulence genes, cluster assignment, serotype, *E. coli* O and H antigen present and any further notes for the result in a tabular format.

### Runtime and memory requirements

The average run time is approximately 0.89s per genome in which the average size of a genome was approximately 4.4 MB on a machine with 4 threads and 32Gb RAM.

Average script runtime for WGS reads was approximately 1.5 minutes on a machine with 4 threads and 32 Gb RAM.

### Determination of presence or absence of genes

The presence or absence of genes were determined by the cutoff value of gene length coverage for assembled genomes and the mapping length percentage and the ratio of mean mapping depth to the average mean mapping depth of 7 HK genes (Table 1). For example, the *ipaH* gene was defined as present if mapping length coverage was over 10% together with the ratio of mean depth to the average mean depth of 7 HK genes was over 1% from reads mapping.

**Table 1: Thresholds used for determination of genes present or absent**

| Typing reference genes        | Genomes              | Reads mapping           |               |
|-------------------------------|----------------------|-------------------------|---------------|
|                               | Gene length coverage | Mapping length coverage | Ratio to 7 HK |
| <i>ipaH</i> gene              | 10%                  | 10%                     | 1%            |
| Virulence genes               | 50%                  | 50%                     | 10%           |
| Cluster-specific gene markers | 50%                  | 50%                     | 10%           |
| O antigen and H antigen genes | 50%                  | 50%                     | 10%           |

### Algorithms for cluster assignment and serotyping

The *Shigella* or EIEC cluster assignment was determined by the presence of cluster-specific gene marker set that was only found within a single *Shigella* or EIEC cluster. Where marker set was used to identify a cluster, all genes must be present for a cluster to be called. ShigEiFinder also used 38 virulence genes from the pINV invasive plasmid to determine whether the plasmid was present in the isolate. When more than 25 of these genes were present, the isolate was considered to be pINV positive.

The presence of cluster-specific gene marker sets combined with the presence of *ipaH* gene and/or virulence genes the isolate was assigned to *Shigella* or EIEC cluster (Table 2).

The isolate assigned as *Shigella* or EIEC unclustered could be any new cluster that cannot be detected by any of cluster-specific gene marker set. Unclustered *Shigella* or EIEC isolate could also be those that all genes in the markers set were present but one or more of the genes from the markers set have mapping ratio between 1% and 10% and do not meet the cutoff for presence and therefore are classified as unclustered (11 isolates of 15,501 isolates in validation dataset were in that category).

**Table 2: The cluster-specific gene markers based cluster assignment**

| Cluster assignment                  | <i>ipaH</i> gene | $\geq 26$ virulence genes | cluster-specific gene/set |
|-------------------------------------|------------------|---------------------------|---------------------------|
| <i>Shigella</i> or EIEC clusters    | +                | +/-                       | +                         |
| <i>Shigella</i> or EIEC unclustered | +                | +/-                       | -                         |
| SB13 or SB13-atypical               | -                | -                         | +                         |
| Not <i>Shigella</i> /EIEC           | -                | -                         | -                         |

“+”: gene presence; “+/-”: can be present or absent; “-”: gene absence.

The serotype is then assigned based on the presence of *Shigella* serotype specific O antigen genes and modification genes or *E. coli* O and H antigen genes. A “novel serotype” is assigned if there is no match to known serotypes.

### Low level contamination check and notes for unclustered *Shigella* or EIEC isolates

The gene markers with mapping ratio between 1% and 10% demonstrated that the genes in the genomes may not be sequenced very well or a potential contamination. In such cases ShigEiFinder will write out a note “Possible contamination by *Shigella* or EIEC strain or low cluster-specific gene mapping depth to HK genes in cluster [cluster name]”.

The genes may have mapping ratio between 1% and 10% are listed in Table 3.

**Table 3: Gene markers with mapping ratio between 1% and 10%**

| Gene markers | Number of isolates of 15,501 isolates |
|--------------|---------------------------------------|
| C1 gene 2    | 8                                     |
| C1 gene 4    | 1                                     |
| C5 gene 1    | 1                                     |
| CSS gene 3   | 1                                     |

### Additional subsets of gene markers used for *Shigella* or EIEC clusters assignment

To increase the accuracy of typing, we added additional subsets of genes to eliminate the known false presences for cluster-specific gene markers. For example, the combination of C1 specific markers set and CSB12 specific gene marker can distinguish CSB12 from C1, if both cluster specific genes are present, the isolate is assigned CSB12 while if CSB12 specific gene is absent, the isolate is assigned as C1. There are 6 subsets of combined genes incorporated into the ShigEiFinder for elimination of false cluster assignment (Table 4).

**Table 4: Subsets of combined gene markers for elimination of false cluster assignment**

| Subset 1 | C1 markers set | CSB12 gene       | Cluster Assignment |
|----------|----------------|------------------|--------------------|
| Isolate  | +              | +                | CSB12              |
| Isolate  | +              | -                | C1                 |
| Isolate  | -              | +                | CSB12              |
| Subset 2 | C1 markers set | CSD1 markers set | Cluster Assignment |
| Isolate  | +              | +                | CSD1               |
| Isolate  | +              | -                | C1                 |
| Isolate  | -              | +                | CSD1               |
| Subset 3 | C1 markers set | C2 markers set   | Cluster Assignment |
| Isolate  | +              | +                | C2                 |
| Isolate  | +              | -                | C1                 |
| Isolate  | -              | +                | C2                 |
| Subset 4 | C3 markers set | C5 markers set   | Cluster Assignment |
| Isolate  | +              | +                | C3                 |
| Isolate  | +              | -                | C3                 |
| Isolate  | -              | +                | C5                 |
| Subset 5 | C5 markers set | C8 markers set   | Cluster Assignment |
| Isolate  | +              | +                | C8                 |
| Isolate  | +              | -                | C5                 |
| Isolate  | -              | +                | C8                 |
| Subset 6 | C2 markers set | CSS markers set  | Cluster Assignment |
| Isolate  | +              | +                | C2                 |
| Isolate  | +              | -                | C2                 |
| Isolate  | -              | +                | CSS                |

“+”: gene presence; “-”: gene absence.

### Serotyping SB1 and SB20 within C1

SB1 and SB20 share identical O antigen genes. For better differentiation of SB1 from SB20, we analysed C1 subbranch on the identification tree (Fig.1 in main text). The 21 isolates with presence of SB1 wzx and wzy genes were grouped into one subbranch which consisted of 2 lineages, lineage I and lineage II as Table 5.

**Table 5: The distribution of SB1 and SB20 isolates in two lineages**

| Lineages   | ShigaTyper assignment |      |      |                |                |
|------------|-----------------------|------|------|----------------|----------------|
|            | SB1                   | SB20 | EIEC | Untypeable     | Total          |
| Lineage I  | 11                    | 0    | 1    | 2 <sup>a</sup> | 14             |
| Lineage II | 4                     | 2    | 2    | 1              | 9 <sup>b</sup> |

<sup>a</sup>: One isolate with the presence of heparinase gene which was used in ShigaTyper to separate SB20 from SB1.

<sup>b</sup>: All 9 isolates had heparinase gene either full length or fragments by BLASTN search.

HierBAPS (4) analysis was further performed to confirm the 2 lineages. Lineage I was defined as potential SB1 lineage and lineage II was defined as SB20 lineage (Figure below). Based on phylogenetic analysis, we identified an SB20 specific gene by comparing 288 accessory genomes in C1 from the identification dataset. The gene was validated with *Shigella* and EIEC validation dataset C1 isolates. The isolate was assigned as SB20 with the presence of SB20 specific gene and SB1 wzx/wzy genes, otherwise the isolate was SB1 with the only SB1 wzx/wzy genes present.

**Figure: Subbranch of C1 on identification tree**

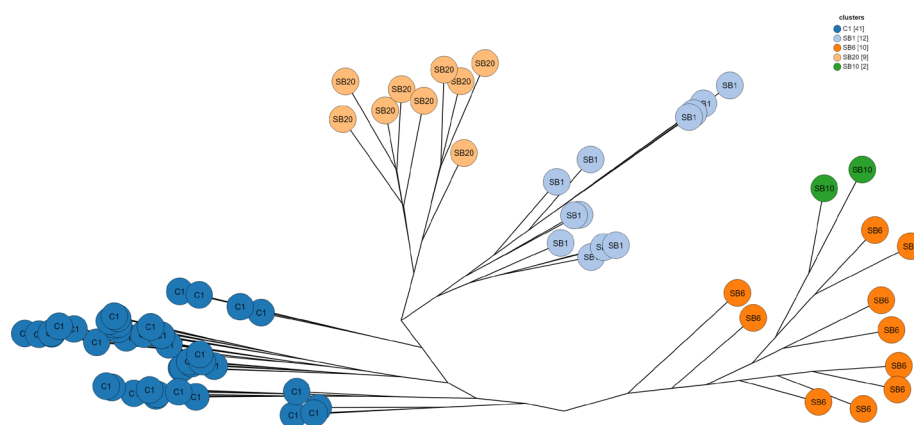

### Serotyping SB6 and SB10 within C1

SB6 and SB10 share identical O antigen genes but there are SNP differences in the O antigen gene clusters. The SNP in SB10 wzx and SB10 wzy genes at positions 904 and 141 respectively were used to separate SB6 from SB10. For assembled genomes, we first checked

the SNP positions that were covered in the blast search with 100% identify for SB10. The isolate was classified as SB10 if the SB10 SNPs were present. Otherwise, the isolate was assigned as SB6. Samtools mpileups was used to gather the nucleotide base at the SNP positions for reads mapping. The isolate was SB10 if the SB10-SNPs was found. The absence of the SNP was assigned as SB6.

### Serotyping EIEC O164/O124

The *E.coli* O164 and O124 O antigen genes are near identical with > 99.4% identity (5). There was a 2-base indel (a frame shift mutation (6)) at positions 429 and 430 in *wfeP* gene of O164 in comparison to O124. We used this indel to differentiate O164 from O124. The isolate was assigned as O164 if the indel was found.

### Multiple variants of H antigens

There are multiple variants for one type of H antigen. To assign an H type when multiple H variants are present, the highest match was chosen as the H antigen present.

### SF serotyping within C3

C3 contains all SF serotypes except for SF6 which is grouped into C1. We used the established scheme of SF O antigen genes and modification genes including *gtr*, *oac* and *opt* genes to type SF within C3 (7-19) (Table 6). ShigEiFIndex assigned all possibilities when there was a multiple match of combinations of modification genes. The isolate was classified as SFY if there was only backbone O antigen genes present. While the isolate was assigned as SF novel serotype if no match to known serotypes and the note was given with the presence or absence of genes.

**Table 6: The combination of O antigen genes and modification genes used for SF serotyping**

|          | <i>wzx5</i> | <i>wzx6</i> | <i>gtrI</i> | <i>gtrC</i> | <i>gtrII</i> | <i>gtrIV</i> | <i>gtrV</i> | <i>gtrX</i> | <i>oac</i> | <i>oacIb</i> | <i>oacB</i> | <i>oacC</i> | <i>oacD</i> | <i>optII</i> | <i>optIII</i> |
|----------|-------------|-------------|-------------|-------------|--------------|--------------|-------------|-------------|------------|--------------|-------------|-------------|-------------|--------------|---------------|
| SF1a     | +           | -           | +           | -           | -            | -            | -           | -           | -          | -            | +/-         | -           | -           | -            | -             |
| SF1b     | +           | -           | +           | -           | -            | -            | -           | -           | -          | +            | +/-         | -           | -           | -            | -             |
| SF1c(7a) | +           | -           | +           | +           | -            | -            | -           | -           | -          | -            | -           | -           | -           | -            | -             |
| SF1d     | +           | -           | +           | -           | -            | -            | -           | +           | -          | -            | -           | -           | -           | -            | -             |
| SF2a     | +           | -           | -           | -           | +            | -            | -           | -           | -          | -            | +/-         | -           | +/-         | -            | -             |
| SF2b     | +           | -           | -           | -           | +            | -            | -           | +           | -          | -            | -           | -           | +/-         | -            | -             |



|          |   |   |   |   |   |   |   |   |     |   |   |   |     |   |   |
|----------|---|---|---|---|---|---|---|---|-----|---|---|---|-----|---|---|
| SF3a     | + | - | - | - | - | - | - | + | +/- | - | - | - | +/- | - | - |
| SF3b     | + | - | - | - | - | - | - | - | +   | - | - | - | -   | - | - |
| SF4a     | + | - | - | - | - | + | - | - | -   | - | - | - | -   | - | - |
| SF4av    | + | - | - | - | - | + | - | - | -   | - | - | - | -   | - | + |
| SF4b     | + | - | - | - | - | + | - | - | +   | - | - | - | -   | - | - |
| SF5a     | + | - | - | - | - | - | + | - | -   | - | + | - | -   | - | - |
| SF5b     | + | - | - | - | - | - | + | + | -   | - | - | - | -   | - | - |
| SF7b     | + | - | - | + | - | - | - | - | +   | - | - | - | -   | - | - |
| SFX      | + | - | - | - | - | - | - | + | -   | - | - | - | +/- | - | - |
| SFXv(4c) | + | - | - | - | - | - | - | + | -   | - | - | - | +/- | + | - |
| SFY      | + | - | - | - | - | - | - | - | -   | - | + | - | +/- | - | - |
| SFYv     | + | - | - | - | - | - | - | - | -   | - | - | - | +   | + | + |
| SF6      | - | + | - | - | - | - | - | - | -   | - | - | - | +/- | - | - |

“+”: gene presence and highlighted in pink color.

“+/-”: can be present or absent.

“-”: gene absence.

## Reference:

1. Wu Y, Lau HK, Lee T, Lau DK, Payne J. *in Silico* Serotyping Based on Whole-Genome Sequencing Improves the Accuracy of *Shigella* Identification. *Applied and environmental microbiology*. 2019;85(7).
2. Joensen KG, Tetzschner AM, Iguchi A, Aarestrup FM, Scheutz F. Rapid and Easy *In Silico* Serotyping of *Escherichia coli* Isolates by Use of Whole-Genome Sequencing Data. *Journal of clinical microbiology*. 2015;53(8):2410-26.
3. Jolley KA, Maiden MC. BIGSdb: Scalable analysis of bacterial genome variation at the population level. *BMC Bioinformatics*. 2010;11:595.
4. Cheng L, Connor TR, Sirén J, Aanensen DM, Corander J. Hierarchical and spatially explicit clustering of DNA sequences with BAPS software. *Molecular biology and evolution*. 2013;30(5):1224-8.
5. Liu B, Furevi A, Perepelov AV, Guo X, Cao H, Wang Q, et al. Structure and genetics of *Escherichia coli* O antigens. *FEMS microbiology reviews*. 2020;44(6):655-83.
6. Liu B, Knirel YA, Feng L, Perepelov AV, Senchenkova SN, Wang Q, et al. Structure and genetics of *Shigella* O antigens. *FEMS microbiology reviews*. 2008;32(4):627-53.
7. Adhikari P, Allison G, Whittle B, Verma NK. Serotype 1a O-antigen modification: molecular characterization of the genes involved and their novel organization in the *Shigella flexneri* chromosome. *Journal of bacteriology*. 1999;181(15):4711-8.
8. Stagg RM, Tang SS, Carlin NI, Talukder KA, Cam PD, Verma NK. A novel glucosyltransferase involved in O-antigen modification of *Shigella flexneri* serotype 1c. *Journal of bacteriology*. 2009;191(21):6612-7.
9. Mavris M, Manning PA, Morona R. Mechanism of bacteriophage SflI-mediated serotype conversion in *Shigella flexneri*. *Molecular microbiology*. 1997;26(5):939-50.
10. Adams MM, Allison GE, Verma NK. Type IV O antigen modification genes in the genome of *Shigella flexneri* NCTC 8296. *Microbiology (Reading, England)*. 2001;147(Pt 4):851-60.
11. Huan PT, Bastin DA, Whittle BL, Lindberg AA, Verma NK. Molecular characterization of the genes involved in O-antigen modification, attachment, integration and excision in *Shigella flexneri* bacteriophage Sfv. *Gene*. 1997;195(2):217-27.

12. Verma NK, Verma DJ, Huan PT, Lindberg AA. Cloning and sequencing of the glucosyl transferase-encoding gene from converting bacteriophage X (SFX) of *Shigella flexneri*. *Gene*. 1993;129(1):99-101.
13. Clark CA, Beltrame J, Manning PA. The *oac* gene encoding a lipopolysaccharide O-antigen acetylase maps adjacent to the integrase-encoding gene on the genome of *Shigella flexneri* bacteriophage Sf6. *Gene*. 1991;107(1):43-52.
14. Sun Q, Lan R, Wang Y, Wang J, Xia S, Wang Y, et al. Identification of a divergent O-acetyltransferase gene *oac* 1b from *Shigella flexneri* serotype 1b strains. *Emerging microbes & infections*. 2012;1(9):e21.
15. Wang J, Knirel YA, Lan R, Senchenkova SN, Luo X, Perepelov AV, et al. Identification of an O-acyltransferase gene (*oacB*) that mediates 3- and 4-O-acetylation of rhamnose III in *Shigella flexneri* O antigens. *Journal of bacteriology*. 2014;196(8):1525-31.
16. Knirel YA, Wang J, Luo X, Senchenkova SN, Lan R, Shpirt AM, et al. Genetic and structural identification of an O-acyltransferase gene (*oacC*) responsible for the 3/4-O-acetylation on rhamnose III in *Shigella flexneri* serotype 6. *BMC microbiology*. 2014;14:266.
17. Sun Q, Knirel YA, Wang J, Luo X, Senchenkova SN, Lan R, et al. Serotype-converting bacteriophage Sfil encodes an acyltransferase protein that mediates 6-O-acetylation of GlcNAc in *Shigella flexneri* O-antigens, conferring on the host a novel O-antigen epitope. *Journal of bacteriology*. 2014;196(20):3656-66.
18. Sun Q, Knirel YA, Lan R, Wang J, Senchenkova SN, Jin D, et al. A novel plasmid-encoded serotype conversion mechanism through addition of phosphoethanolamine to the O-antigen of *Shigella flexneri*. *PloS one*. 2012;7(9):e46095.
19. Knirel YA, Lan R, Senchenkova SN, Wang J, Shashkov AS, Wang Y, et al. O-antigen structure of *Shigella flexneri* serotype Yv and effect of the *lpt-O* gene variation on phosphoethanolamine modification of *S. flexneri* O-antigens. *Glycobiology*. 2013;23(4):475-85.

**Dataset S3: *Shigella*/EIEC serotypes specific O and H antigens used in ShigEiFinder**

*Shigella* serotype specific O antigen genes were collected from ShigaTyper (1). *E.coli* O antigen genes and *fliC* genes were collected from SerotypeFinder (2).

| Sequences           | Accession number |
|---------------------|------------------|
| SD1_wzx, SD1_wzy    | L07293           |
| SD1-rfp             | CP000640         |
| SD2_wzx, SD2_wzy    | EU296404         |
| SD3_wzx, SD3_wzy    | EU296415         |
| SD4_wzx, SD4_wzy    | EU296402         |
| SD5_wzx, SD5_wzy    | EU294174         |
| SD6_wzx, SD6_wzy    | EU296414         |
| SD7_wzx, SD7_wzy    | AY380835         |
| SD8_wzx, SD8_wzy    | EU294166         |
| SD9_wzx, SD9_wzy    | EU296416         |
| SD10_wzx, SD10_wzy  | EU294178         |
| SD11_wzx, SD11_wzy  | EU294172         |
| SD12_wzx, SD12_wzy  | EU294169         |
| SD13_wzx, SD13_wzy  | EU294167         |
| SD14_wzx, SD14_wzy  | CP026832         |
| SD15_wzx, SD15_wzy  | CP026834         |
| SDP 96-265_wzx, wzy | CP026819         |
| SDP E670-74_wzx,wzy | CP027027         |
| SB1_wzx, SB1_wzy    | AY630255         |
| SB2_wzx, SB2_wzy    | EU296418         |
| SB3_wzx, SB3_wzy    | EU296407         |
| SB4_wzx, SB4_wzy    | AF402312         |
| SB5_wzx, SB5_wzy    | AF402313         |
| SB6_wzx, SB6_wzy    | AF402314         |
| SB7_wzx, SB7_wzy    | EU296411         |
| SB8_wzx, SB8_wzy    | EU294163         |

|                      |                      |
|----------------------|----------------------|
| SB9_wzx, SB9_wzy     | AF402315             |
| SB10_wzx, SB10_wzy   | AY693427             |
| WbaM                 | AY693427             |
| SB11_wzx, SB11_wzy   | AY529126             |
| SB12_wzx, SB12_wzy   | EU296406             |
| SB13_wzx, SB13_wzy   | AY369140             |
| SB14_wzx, SB14_wzy   | EU296409             |
| SB15_wzx, SB15_wzy   | EU296412             |
| SB16_wzx, SB16_wzy   | DQ371800             |
| SB17_wzx, SB17_wzy   | DQ875941             |
| SB18_wzx, SB18_wzy   | AY948196             |
| SB19_wzx, SB19_wzy   | CP026814             |
| Heparinase           | CP016036             |
| SBP E1621-54_wzx,wzy | CP026810             |
| SF_wzx1-5 gene       | AE005674             |
| SF6_wzx gene         | EU294165             |
| SF <i>gtrI</i>       | AF139596             |
| SF <i>gtrIC</i>      | FJ905303             |
| SF <i>gtrII</i>      | AF021347             |
| SF <i>gtrIV</i>      | AF288197             |
| SF <i>gtrV</i>       | U82619               |
| SF <i>gtrX</i>       | L05001               |
| SF <i>oacA</i>       | AF547987             |
| SF <i>oacIb</i>      | JN377795             |
| SF <i>oacB</i>       | NC_004337 (SF0315)   |
| SF <i>oacC</i>       | AKMW01000058         |
| SF <i>oacD</i>       | NC_004337 (SF0309)   |
| SF <i>optIII</i>     | KC020049             |
| SF Xv <i>optII</i>   | CP001385 (SFxv_5135) |
| SS_wzx, SS_wzy       | AF285971             |
|                      |                      |
| O1_wzx, O1_wzy       | GU299791             |

|                      |          |
|----------------------|----------|
| O2_wzx, O2_wzy       | EU549863 |
| O4_wzx, O4_wzy       | AY568960 |
| O6_wzx, O6_wzy       | AJ426045 |
| O7_wzx, O7_wzy       | AF125322 |
| O8_wzx, O8_wzy       | AF013583 |
| O8_wzm, O8_wzt       | AB010150 |
| O12_wzx, O12_wzy     | AB811600 |
| O13_wzx, O13_wzy     | EU296422 |
| O16_wzx, O16_wzy     | AB811601 |
| O17_wzx, O17_wzy     | AB812084 |
| O18ac_wzx, O18ac_wzy | AB811603 |
| O21_wzx, O21_wzy     | EU694098 |
| O22_wzx, O22_wzy     | AB811606 |
| O25_wzx, O25_wzy     | GU014554 |
| O26_wzx, O26_wzy     | AF529080 |
| O28ac_wzx, O28ac_wzy | DQ462205 |
| O29_wzx, O29_wzy     | EU294173 |
| O32_wzx, O32_wzy     | EU296410 |
| O36_wzx, O36_wzy     | AB811613 |
| O39_wzx, O39_wzy     | AB811616 |
| O40_wzx, O40_wzy     | EU296417 |
| O50_wzx, O50_wzy     | AB811624 |
| O53_wzx, O53_wzy     | EU289392 |
| O71_wzx, O71_wzy     | GU445927 |
| O77_wzx, O77_wzy     | AB972416 |
| O79_wzx, O79_wzy     | EU294162 |
| O86_wzx, O86_wzy     | AY220982 |
| O89_wzx, O89_wzy     | AB812038 |
| O92_wzx, O92_wzy     | AB812040 |
| O93_wzx, O93_wzy     | AB812041 |
| O96_wzx, O96_wzy     | AB812043 |
| O102_wzx, O102_wzy   | JX087966 |

|                        |              |
|------------------------|--------------|
| O105_wzx, O105_wzy     | EU294171     |
| O110_wzx, O110_wzy     | AB812049     |
| O111_wzx, O111_wzy     | JN887675     |
| O112ab_wzx, O112ab_wzy | EU296413     |
| O112ac_wzx, O112ac_wzy | EU296405     |
| O117_wzx, O117_wzy     | EU694096     |
| O118_wzx, O118_wzy     | HM204927     |
| O121_wzx, O121_wzy     | JN859209     |
| O124_wzx, O124_wzy     | EU296419     |
| O129_wzx, O129_wzy     | EU296424     |
| O130_wzx, O130_wzy     | EU296421     |
| O132_wzx, O132_wzy     | AB812056     |
| O135_wzx, O135_wzy     | EU296423     |
| O136_wzx, O136_wzy     | AB812059     |
| O143_wzx, O143_wzy     | EU294164     |
| O144_wzx, O144_wzy     | AB812062     |
| O147_wzx, O147_wzy     | DQ868766     |
| O148_wzx, O148_wzy     | DQ167407     |
| O149_wzx, O149_wzy     | DQ868764     |
| O151_wzx, O151_wzy     | HM204926     |
| O152_wzx, O152_wzy     | EU294170     |
| O155_wzx, O155_wzy     | AY657020     |
| O162_wzx, O162_wzy     | AB812067     |
| O164_wzx, O164_wzy     | EU296420     |
| O167_wzx, O167_wzy     | EU296408     |
| O173_wzx, O173_wzy     | GU068046     |
| O180_wzx, O180_wzy     | JQ751058     |
| O183_wzx, O183_wzy     | AB627352     |
| H1_fliC                | AB028471     |
| H2_fliC                | AIHA01000023 |
| H4_fliC                | AJ605764     |
| H4_fliC                | AJ605765     |

|                  |                    |
|------------------|--------------------|
| H4_ <i>fliC</i>  | AJ536600           |
| H5_ <i>fliC</i>  | AY249990           |
| H5_ <i>fliC</i>  | AY337469           |
| H6_ <i>fliC</i>  | AIEY01000041       |
| H7_ <i>fliC</i>  | AY337468           |
| H7_ <i>fliC</i>  | AKML01000326       |
| H7_ <i>fliC</i>  | ANLT01000257       |
| H7_ <i>fliC</i>  | ANLJ01000383       |
| H7_ <i>fliC</i>  | AOES01000098       |
| H7_ <i>fliC</i>  | AMVH01000352       |
| H7_ <i>fliC</i>  | AF228487           |
| H7_ <i>fliC</i>  | AF228496           |
| H7_ <i>fliC</i>  | AF228495           |
| H7_ <i>fliC</i>  | AB334575           |
| H7_ <i>fliC</i>  | AB334574           |
| H7_ <i>fliC</i>  | AF228494           |
| H7_ <i>fliC</i>  | AF228491           |
| H7_ <i>fliC</i>  | AF228492           |
| H7_ <i>fliC</i>  | AB028474           |
| H8_ <i>fliC</i>  | AJ865465           |
| H9_ <i>fliC</i>  | AY249994           |
| H10_ <i>fliC</i> | AF169320           |
| H11_ <i>fliC</i> | AY337472           |
| H12_ <i>fliC</i> | AY337471           |
| H14_ <i>fliC</i> | AY249998           |
| H16_ <i>fliC</i> | AB128919           |
| H16_ <i>fliC</i> | JH954529           |
| H16_ <i>fliC</i> | JH953794           |
| H16_ <i>fliC</i> | AY337476           |
| H16_ <i>fliC</i> | AY337477           |
| H16_ <i>fliC</i> | AY337475 AY2500001 |
| H16_ <i>fliC</i> | AY250000           |





Reference:

1. Wu Y, Lau HK, Lee T, Lau DK, Payne J. *In Silico* Serotyping Based on Whole-Genome Sequencing Improves the Accuracy of *Shigella* Identification. *Applied and environmental microbiology*. 2019;85(7).
2. Joensen KG, Tetzschner AM, Iguchi A, Aarestrup FM, Scheutz F. Rapid and Easy *In Silico* Serotyping of *Escherichia coli* Isolates by Use of Whole-Genome Sequencing Data. *Journal of clinical microbiology*. 2015;53(8):2410-26.
